# Supplementary material
Source: PubMed Central journal article supplement (PMC2567471)
Supplement: 0806554105_0806554105SI.pdf [file 0806554105_0806554105SI.pdf]

# Supporting Information

Tamas *et al.* 10.1073/pnas.0806554105

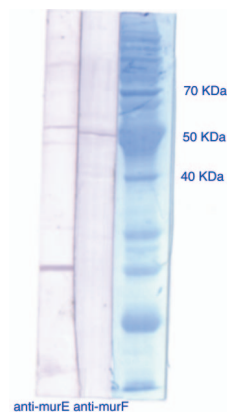

**Fig. S1.** Western blot of the total protein content of *Buchnera aphidicola* cells extracted from adult *Rhopalosiphum padi* aphids and probed with anti-murE (left lane) and anti-murF (middle lane) antibodies.







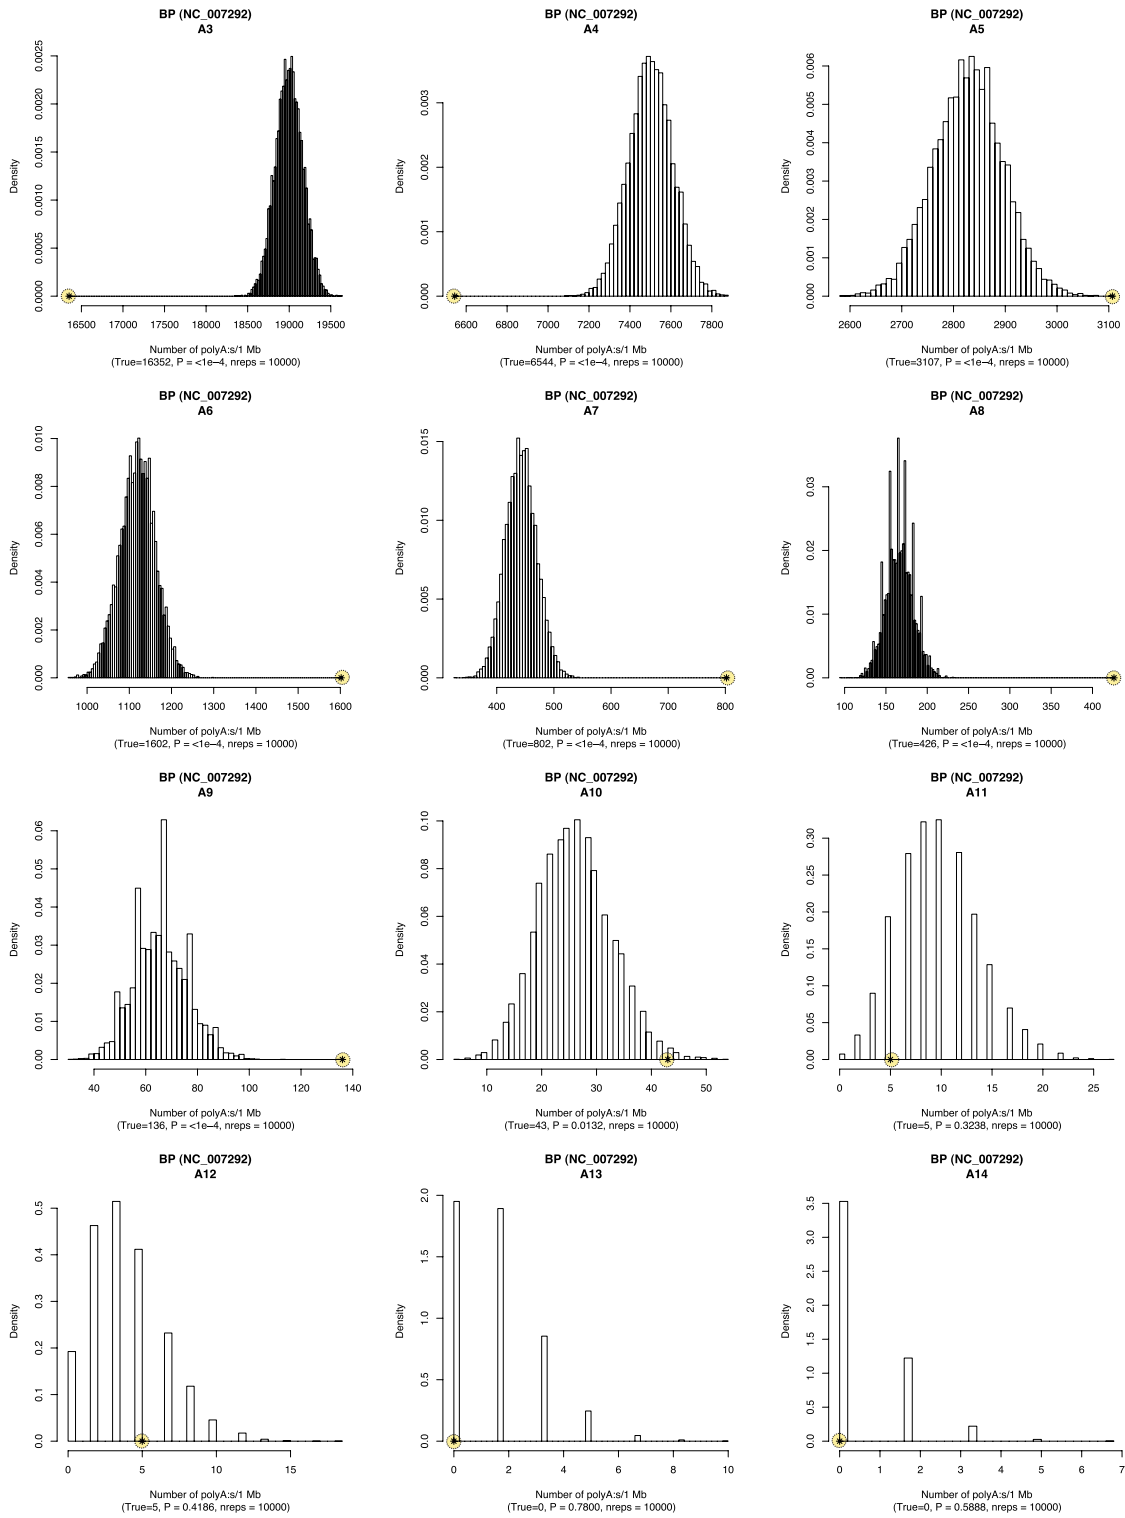

Fig. S2. (Continued.)





**Table S1. Nonsynonymous (dN) and synonymous substitutions (dS) per site for genes in the *dcw* cluster in *B. aphidicola* are shown above and below the diagonal, respectively, with the ratio dN/dS shown below the substitution frequency matrix for each gene**

|             | Sg           | Rp            | As           | Ap           | Mt           | Dn           |
|-------------|--------------|---------------|--------------|--------------|--------------|--------------|
| <i>murE</i> |              |               |              |              |              |              |
| Sg          | NA           | 0.06 ± 0.008  | 0.17 ± 0.015 | 0.20 ± 0.016 | 0.22 ± 0.018 | 0.21 ± 0.017 |
| Rp          | 0.98 ± 0.35  | NA            | 0.15 ± 0.014 | 0.19 ± 0.016 | 0.21 ± 0.017 | 0.22 ± 0.017 |
| As          | 2.96 ± 1.97  | 1.96 ± 0.54   | NA           | 0.23 ± 0.018 | 0.23 ± 0.018 | 0.23 ± 0.018 |
| Ap          | 2.10 ± 0.64  | 2.02 ± 0.57   | 3.72 ± 5.21  | NA           | 0.14 ± 0.014 | 0.18 ± 0.015 |
| Mt          | 1.92 ± 0.66  | 2.47 ± 1.06   | 3.65 ± 4.96  | 1.54 ± 0.32  | NA           | 0.19 ± 0.016 |
| Dn          | 3.65 ± 4.96  | 3.68 ± 5.06   | 3.67 ± 5.04  | 2.33 ± 0.85  | 3.62 ± 4.86  | NA           |
| dN/dS       |              |               |              |              |              |              |
| Sg          | NA           |               |              |              |              |              |
| Rp          | 0.061        | NA            |              |              |              |              |
| As          | 0.056        | 0.078         | NA           |              |              |              |
| Ap          | 0.094        | 0.092         | 0.062        | NA           |              |              |
| Mt          | 0.011        | 0.084         | 0.064        | 0.093        | NA           |              |
| Dn          | 0.058        | 0.059         | 0.063        | 0.076        | 0.053        | NA           |
| <i>murF</i> |              |               |              |              |              |              |
| Sg          | NA           | 0.074 ± 0.009 | 0.16 ± 0.013 | 0.19 ± 0.014 | 0.20 ± 0.015 | 0.18 ± 0.014 |
| Rp          | 0.87 ± 0.20  | NA            | 0.15 ± 0.013 | 0.19 ± 0.014 | 0.19 ± 0.014 | 0.18 ± 0.014 |
| As          | 2.21 ± 0.62  | 1.52 ± 0.25   | NA           | 0.23 ± 0.016 | 0.21 ± 0.015 | 0.23 ± 0.016 |
| Ap          | 2.88 ± 1.44  | 1.51 ± 0.24   | 1.63 ± 0.43  | NA           | 0.12 ± 0.011 | 0.15 ± 0.013 |
| Mt          | 3.97 ± 6.13  | 1.97 ± 0.77   | 2.49 ± 0.91  | 1.32 ± 0.25  | NA           | 0.17 ± 0.013 |
| Dn          | 2.70 ± 1.12  | 1.99 ± 0.79   | 2.82 ± 1.35  | 1.76 ± 0.34  | 1.90 ± 0.41  | NA           |
| dN/dS       |              |               |              |              |              |              |
| Sg          | NA           |               |              |              |              |              |
| Rp          | 0.085        | NA            |              |              |              |              |
| As          | 0.072        | 0.010         | NA           |              |              |              |
| Ap          | 0.066        | 0.012         | 0.014        | NA           |              |              |
| Mt          | 0.050        | 0.097         | 0.086        | 0.091        | NA           |              |
| Dn          | 0.068        | 0.091         | 0.081        | 0.086        | 0.087        | NA           |
| <i>mraY</i> |              |               |              |              |              |              |
| Sg          | NA           | 0.077 ± 0.010 | 0.17 ± 0.016 | 0.20 ± 0.017 | 0.21 ± 0.017 | 0.22 ± 0.018 |
| Rp          | 0.80 ± 0.23  | NA            | 0.16 ± 0.015 | 0.19 ± 0.017 | 0.19 ± 0.017 | 0.20 ± 0.017 |
| As          | 1.57 ± 0.444 | 1.33 ± 0.32   | NA           | 0.20 ± 0.018 | 0.22 ± 0.018 | 0.22 ± 0.018 |
| Ap          | 1.40 ± 0.31  | 1.66 ± 0.53   | 1.91 ± 0.45  | NA           | 0.12 ± 0.013 | 0.13 ± 0.013 |
| Mt          | 1.25 ± 0.22  | 1.68 ± 0.41   | 1.49 ± 0.28  | 0.94 ± 0.22  | NA           | 0.16 ± 0.015 |
| Dn          | 3.45 ± 10.8  | 2.49 ± 0.98   | 3.15 ± 4.77  | 1.49 ± 0.35  | 1.36 ± 0.08  | NA           |
| dN/dS       |              |               |              |              |              |              |
| Sg          | NA           |               |              |              |              |              |
| Rp          | 0.096        | NA            |              |              |              |              |
| As          | 0.110        | 0.119         | NA           |              |              |              |
| Ap          | 0.139        | 0.112         | 0.107        | NA           |              |              |
| Mt          | 0.165        | 0.116         | 0.147        | 0.129        | NA           |              |
| Dn          | 0.063        | 0.081         | 0.069        | 0.086        | 0.122        | NA           |
| <i>murD</i> |              |               |              |              |              |              |
| Sg          | NA           | 0.06 ± 0.008  | 0.18 ± 0.014 | 0.18 ± 0.014 | 0.20 ± 0.015 | 0.21 ± 0.015 |
| Rp          | 1.23 ± 0.55  | NA            | 0.18 ± 0.014 | 0.18 ± 0.014 | 0.20 ± 0.015 | 0.20 ± 0.015 |
| As          | 2.60 ± 1.07  | 3.86 ± 5.69   | NA           | 0.20 ± 0.015 | 0.23 ± 0.016 | 0.21 ± 0.016 |
| Ap          | 3.90 ± 5.84  | 3.86 ± 5.70   | 2.94 ± 1.66  | NA           | 0.15 ± 0.012 | 0.17 ± 0.014 |
| Mt          | 3.86 ± 5.70  | 3.82 ± 5.55   | 2.96 ± 1.74  | 1.43 ± 0.25  | NA           | 0.18 ± 0.014 |
| Dn          | 3.89 ± 5.81  | 3.85 ± 5.68   | 3.94 ± 6.25  | 1.64 ± 0.31  | 1.77 ± 0.38  | NA           |
| dN/dS       |              |               |              |              |              |              |
| Sg          | NA           |               |              |              |              |              |
| Rp          | 0.050        | NA            |              |              |              |              |
| As          | 0.068        | 0.048         | NA           |              |              |              |
| Ap          | 0.046        | 0.048         | 0.069        | NA           |              |              |
| Mt          | 0.053        | 0.052         | 0.076        | 0.103        | NA           |              |
| Dn          | 0.053        | 0.052         | 0.054        | 0.106        | 0.104        | NA           |
| <i>ftsW</i> |              |               |              |              |              |              |
| Sg          | NA           | 0.02 ± 0.005  | 0.08 ± 0.01  | 0.12 ± 0.013 | 0.14 ± 0.014 | 0.14 ± 0.014 |
| Rp          | 0.65 ± 0.17  | NA            | 0.08 ± 0.01  | 0.12 ± 0.013 | 0.15 ± 0.014 | 0.14 ± 0.014 |
| As          | 1.61 ± 1.00  | 1.12 ± 0.21   | NA           | 0.13 ± 0.013 | 0.15 ± 0.014 | 0.13 ± 0.014 |
| Ap          | 1.21 ± 0.24  | 2.13 ± 2.78   | 1.35 ± 0.31  | NA           | 0.10 ± 0.011 | 0.10 ± 0.012 |
| Mt          | 1.43 ± 0.44  | 1.46 ± 0.37   | 2.75 ± 14.6  | 1.09 ± 0.24  | NA           | 0.13 ± 0.013 |
| Dn          | 1.91 ± 0.68  | 1.74 ± 0.54   | 1.98 ± 0.86  | 1.64 ± 0.76  | 1.24 ± 0.35  | NA           |



|             | Sg           | Rp           | As           | Ap           | Mt           | Dn           |
|-------------|--------------|--------------|--------------|--------------|--------------|--------------|
| dN/dS       |              |              |              |              |              |              |
| Sg          | NA           |              |              |              |              |              |
| Rp          | 0.037        | NA           |              |              |              |              |
| As          | 0.051        | 0.067        | NA           |              |              |              |
| Ap          | 0.100        | 0.058        | 0.095        | NA           |              |              |
| Mt          | 0.100        | 0.100        | 0.054        | 0.088        | NA           |              |
| Dn          | 0.071        | 0.081        | 0.067        | 0.064        | 0.104        | NA           |
| <i>murG</i> |              |              |              |              |              |              |
| Sg          | NA           | 0.05 ± 0.008 | 0.15 ± 0.014 | 0.18 ± 0.016 | 0.19 ± 0.016 | 0.18 ± 0.016 |
| Rp          | 1.24 ± 0.39  | NA           | 0.14 ± 0.013 | 0.17 ± 0.015 | 0.18 ± 0.016 | 0.17 ± 0.016 |
| As          | 3.75 ± 5.30  | 3.70 ± 5.16  | NA           | 0.20 ± 0.017 | 0.20 ± 0.017 | 0.21 ± 0.017 |
| Ap          | 3.76 ± 5.35  | 3.72 ± 5.20  | 2.12 ± 0.65  | NA           | 0.12 ± 0.013 | 0.17 ± 0.015 |
| Mt          | 3.75 ± 5.30  | 3.70 ± 5.14  | 4.40 ± 12.9  | 2.40 ± 0.93  | NA           | 0.18 ± 0.016 |
| Dn          | 3.81 ± 5.54  | 3.77 ± 5.40  | 1.93 ± 0.57  | 2.40 ± 0.88  | 4.10 ± 8.32  | NA           |
| dN/dS       |              |              |              |              |              |              |
| Sg          | NA           |              |              |              |              |              |
| Rp          | 0.044        | NA           |              |              |              |              |
| As          | 0.039        | 0.037        | NA           |              |              |              |
| Ap          | 0.049        | 0.047        | 0.096        | NA           |              |              |
| Mt          | 0.052        | 0.049        | 0.047        | 0.052        | NA           |              |
| Dn          | 0.046        | 0.047        | 0.107        | 0.071        | 0.043        | NA           |
| <i>murC</i> |              |              |              |              |              |              |
| Sg          | NA           | 0.06 ± 0.007 | 0.15 ± 0.012 | 0.21 ± 0.015 | 0.19 ± 0.014 | 0.20 ± 0.015 |
| Rp          | 0.80 ± 0.26  | NA           | 0.16 ± 0.013 | 0.21 ± 0.015 | 0.19 ± 0.014 | 0.21 ± 0.015 |
| As          | 1.79 ± 0.37  | 1.52 ± 0.26  | NA           | 0.22 ± 0.015 | 0.18 ± 0.014 | 0.21 ± 0.015 |
| Ap          | 1.85 ± 0.40  | 2.03 ± 0.49  | 1.67 ± 0.31  | NA           | 0.14 ± 0.011 | 0.18 ± 0.014 |
| Mt          | 3.86 ± 5.72  | 3.90 ± 5.84  | 2.34 ± 0.76  | 2.20 ± 1.47  | NA           | 0.18 ± 0.013 |
| Dn          | 2.39 ± 0.78  | 2.54 ± 0.92  | 3.02 ± 1.73  | 2.04 ± 0.48  | 2.64 ± 1.09  | NA           |
| dN/dS       |              |              |              |              |              |              |
| Sg          | NA           |              |              |              |              |              |
| Rp          | 0.072        | NA           |              |              |              |              |
| As          | 0.086        | 0.105        | NA           |              |              |              |
| Ap          | 0.112        | 0.102        | 0.129        | NA           |              |              |
| Mt          | 0.050        | 0.050        | 0.079        | 0.062        | NA           |              |
| Dn          | 0.086        | 0.081        | 0.071        | 0.090        | 0.067        | NA           |
| <i>ddIB</i> |              |              |              |              |              |              |
| Sg          | NA           | 0.069 ± 0.01 | 0.17 ± 0.016 | 0.18 ± 0.017 | 0.21 ± 0.018 | 0.22 ± 0.019 |
| Rp          | 1.22 ± 0.74  | NA           | 0.17 ± 0.016 | 0.19 ± 0.017 | 0.22 ± 0.019 | 0.22 ± 0.019 |
| As          | 4.48 ± 15.86 | 3.59 ± 4.78  | NA           | 0.20 ± 0.018 | 0.21 ± 0.018 | 0.22 ± 0.019 |
| Ap          | 3.59 ± 4.79  | 3.62 ± 4.87  | 2.95 ± 2.07  | NA           | 0.13 ± 0.014 | 0.19 ± 0.018 |
| Mt          | 3.57 ± 4.71  | 3.60 ± 4.80  | 3.55 ± 4.65  | 2.87 ± 1.84  | NA           | 0.20 ± 0.018 |
| Dn          | 3.62 ± 4.86  | 3.64 ± 4.94  | 1.89 ± 0.52  | 1.94 ± 0.54  | 2.11 ± 0.68  | NA           |
| dN/dS       |              |              |              |              |              |              |
| Sg          | NA           |              |              |              |              |              |
| Rp          | 0.056        | NA           |              |              |              |              |
| As          | 0.038        | 0.049        | NA           |              |              |              |
| Ap          | 0.051        | 0.052        | 0.067        | NA           |              |              |
| Mt          | 0.059        | 0.062        | 0.060        | 0.045        | NA           |              |
| Dn          | 0.060        | 0.061        | 0.116        | 0.098        | 0.095        | NA           |

Sequences have been corrected for frameshift mutations prior to the calculations with PAML 3.14 under yn00 (1). In comparison to the synonymous substitutions, which are in most cases saturated, non-synonymous substitution frequencies are lower and similar across genes, irrespectively of whether the frame is shifted or not. Strain designations are as described in *Materials and Methods*. Gene names and gene products are as follows: *murE*, UDP-*N*-acetylmuramyl-L-alanyl-D-glutamate: 2,6-diaminopimelate ligase; *murF*, UDP-*N*-acetylmuramyl-L-alanyl-D-glutamyl-2,6-diaminopimelate: D-alanyl-D-alaninylase; *mraY*, phospho-*N*-acetylmuramylpentapeptidyltransferase; *murD*, UDP-*N*-acetylmuramyl-L-alanine: D-glutamate ligase; *ftsW*, cell division protein; *murG*, UDP-*N*-acetylglucosamine: N-acetylmuramylpentapeptidepyrophosphoryl-undecaprenol-*N*-acetylglucosaminyltransferase; *murC*, UDP-*N*-acetylmuramate:L-alaninylase; *ddIB*, D-alanine: D-alaninylase.

1. Yang Z, Nielsen R (2000) Estimating synonymous and nonsynonymous substitution rates under realistic evolutionary models. *Mol Biol Evol* 17:32–43.

**Table S2. Control experiments of the error frequencies at homopolymeric tracts of 10–12 As in the PCR and RT-PCR experiments**

| Template* | RNA-oligo     | Re-seq         | PCR            | Re-streak                    | PCR       |
|-----------|---------------|----------------|----------------|------------------------------|-----------|
|           |               | Single Plasmid | Single Plasmid | Single <i>E. coli</i> strain | gDNA BA   |
| Locus     | <i>ytfM-2</i> | <i>ytfM-2</i>  | <i>hisH</i>    | <i>murE</i>                  |           |
| <8 A      | 3             | 0              | 0              | 0                            | 0         |
| 8 A       | 1             | 0              | 0              | 0                            | 0         |
| 9 A       | 3             | 0              | 0              | 0                            | 3         |
| 10 A      | 1             | 0              | 0              | 0                            | <b>59</b> |
| 11 A      | <b>56</b>     | <b>8</b>       | <b>10</b>      | 0                            | 0         |
| 12 A      | 2             | 0              | 0              | <b>14</b>                    | 0         |
| 13 A      | 1             | 0              | 0              | 0                            | 0         |
| Total     | 67            | 8              | 10             | 14                           | 62        |
| Error, %  | 16            | 0              | 0              | 0                            | 5         |

Numbers in bold = the number of As in the original genomic DNA.

\*To control for slippage errors in M-MLV, we followed a previously suggested approach (1) and analyzed a synthetic RNA oligonucleotide of known sequence (Lane RNA-oligo): (GUCCACGAUGAGACCAAUAAAAAAAAAAAA-UACCAGCAUCAUCC, synthesized by Dharmacon). The regionCAAUUA<sub>11</sub>U matches the genomic DNA sequence for *B. pennsylvanicus hisH*. The RNA oligomer was used as template for first-strand cDNA synthesis, using the same reverse transcription method that we applied to the ant RNA samples above (M-MLV reverse transcriptase and random decamers; RETROscript: Ambion). The single-stranded cDNA was PCR-amplified with complementing primers (*hisH*.oligo.F: GTCCACGATGAGACC and *hisH*.oligo.R: GGATGGATGTGCTGG). The resulting product was TA cloned into the pCR4-TOPO vector (Invitrogen). Multiple clones were sequenced as described above. Whereas endosymbiont cDNAs often showed slippage of +/- one bp, the few length variants in the RNA oligo control often show larger differences of 2 bp or more.

To control for errors during plasmid replication in *E. coli*, we streaked a single colony onto LB. From 14 resulting colonies, plasmid DNA was prepared and sequenced (Lane "Re-streak single *E. coli* strain"). As a control for polymerase errors in DNA sequencing, plasmid DNA from one of the *ytfM-2* cDNA clones with an 11 A tract from *B. pennsylvanicus* was sequenced 8 times (Lane "Re-seq single plasmid"). To control for slippage by the Taq polymerase used in PCR, we performed 10 replicate PCR reactions of the *ytfM-2* cDNA clone and sequenced these (Lane "PCR single plasmid"). In all of these cases, the original number of As was observed.

We also amplified a *murE* gene fragment with 10 A by PCR from genomic DNA of *B. aphidicola* and made a plasmid library with the same procedure as in the RT-PCR experiments except that no Reverse Transcriptase step was used in the experiment (Lane "PCR gDNA BA"). From the resulting 62 colonies, plasmid DNA was prepared and sequenced, of which 59 contained the original 10 A tract. Another fragment of the *murC* gene bearing a 9 A tract was also cloned into an expression vector and expressed in *Saccharomyces cerevisiae*. We performed RT-PCR and sequenced cloned products in both directions. Consistent with previous observations, no slippage was observed in *S. cerevisiae* (2).

1. Larsen B, Wills NM, Nelson C, Atkins JF, Gesteland RF (2000) Nonlinearity in genetic decoding: Homologous DNA replicase genes use alternatives of transcriptional slippage or translational frameshifting. *Proc Natl Acad Sci USA* 97:1683–1688.
2. Wagner LA, Weiss RB, Driscoll R, Dunn DS, Gesteland RF (1990) Transcriptional slippage occurs during elongation at runs of adenine or thymine in *Escherichia coli*. *Nucleic Acids Res* 18:3529–3535.

**Table S3. Poly(A) tracts of 10 nucleotides or more in protein coding genes**

| Species* | poly(A)/Mb <sup>†</sup> | % of all CDS <sup>‡</sup> | poly(A)/CDS <sup>§</sup> | % GC <sup>¶</sup> |
|----------|-------------------------|---------------------------|--------------------------|-------------------|
| BA (Cc)  | 1,491                   | 57                        | 2.6                      | 20                |
| WG       | 210                     | 18                        | 1.2                      | 22                |
| BA (Sg)  | 156                     | 14                        | 1.1                      | 25                |
| UU       | 1.5                     | <1                        | 1.0                      | 25                |
| BP       | 48                      | 5                         | 1.0                      | 29                |
| EC (K12) | 0                       | —                         | —                        | 50                |

\*Species abbreviations: BA (Cc), *B. aphidicola* (Cc); BA (Sg): *B. aphidicola* (Sg); WG, *W. glossinidia*; UU, *U. urealyticum*; BP: *B. pennsylvanicus*; EC (K12): *E. coli* (K12).

<sup>†</sup>Number of poly(A) tracts per million nucleotides of the proteome.

<sup>‡</sup>Fraction of all coding genes with at least one poly(A) tract.

<sup>§</sup>Average number of poly(A) tracts in genes containing at least one poly(A) tract.

<sup>¶</sup>Genomic G + C content.

**Table S4. Functional categories for protein coding genes containing poly(A) tracts of 10 nucleotides or more**

| Functional category                    | BA (Sg)*             |                  | BA (Cc)*             |                  |
|----------------------------------------|----------------------|------------------|----------------------|------------------|
|                                        | Poly(A) <sup>†</sup> | Tot <sup>‡</sup> | Poly(A) <sup>†</sup> | Tot <sup>‡</sup> |
| <b>Information storage</b>             |                      |                  |                      |                  |
| [J] Translation, ribosome structure    | 14                   | 89               | 40                   | 93               |
| [A] RNA processing/modification        | 0                    | 1                | 0                    | 0                |
| [K] Transcription                      | 3                    | 16               | 5                    | 10               |
| [L] Replication, recombination         | 9                    | 33               | 23                   | 29               |
| <b>Cellular processes</b>              |                      |                  |                      |                  |
| [D] Cell cycle control                 | 1                    | 8                | 5                    | 6                |
| [V] Defense mechanisms                 | 1                    | 3                | 2                    | 2                |
| [T] Signal transduction                | 0                    | 4                | 3                    | 3                |
| [M] Cell wall/membrane                 | 6                    | 23               | 2                    | 3                |
| [N] Cell motility                      | 1                    | 23               | 9                    | 12               |
| [U] Intracellular trafficking          | 4                    | 24               | 4                    | 8                |
| [O] Posttranslational modification     | 4                    | 39               | 13                   | 19               |
| <b>Metabolism</b>                      |                      |                  |                      |                  |
| [C] Energy production                  | 5                    | 41               | 14                   | 28               |
| [G] Carbohydrate transport/metabolism  | 2                    | 22               | 8                    | 16               |
| [E] Amino acid transport/metabolism    | 5                    | 55               | 15                   | 25               |
| [F] Nucleotide transport/metabolism    | 2                    | 23               | 3                    | 5                |
| [H] Coenzyme transport/metabolism      | 1                    | 30               | 4                    | 5                |
| [I] Lipid transport/metabolism         | 1                    | 12               | 6                    | 7                |
| [P] Inorganic ion transport/metabolism | 1                    | 15               | 3                    | 5                |
| [Q] Secondary metabolites              | 0                    | 2                | 1                    | 1                |
| <b>Poorly characterized</b>            |                      |                  |                      |                  |
| [R] General function prediction only   | 8                    | 29               | 11                   | 12               |
| [S] Function unknown                   | 3                    | 14               | 7                    | 12               |

\*Species abbreviations: BA (Sg), *B. aphidicola* (Sg); BA (Cc), *B. aphidicola* (Cc).

<sup>†</sup>Poly(A) = Number of protein coding genes containing at least one poly(A) tract of 10 nucleotides or more.

<sup>‡</sup>Total number of protein coding genes.

**Table S5. Functional categories for protein coding genes containing poly(A) tracts of 10 nucleotides or more**

| Functional category                    | BP*                  |                  | WG*                  |                  |
|----------------------------------------|----------------------|------------------|----------------------|------------------|
|                                        | Poly(A) <sup>†</sup> | Tot <sup>‡</sup> | Poly(A) <sup>†</sup> | Tot <sup>‡</sup> |
| <b>Information storage</b>             |                      |                  |                      |                  |
| [J] Translation, ribosome structure    | 5                    | 89               | 14                   | 82               |
| [A] RNA processing/modification        | 0                    | 1                | 0                    | 1                |
| [K] Transcription                      | 1                    | 21               | 2                    | 20               |
| [L] Replication, recombination         | 2                    | 29               | 9                    | 28               |
| <b>Cellular processes</b>              |                      |                  |                      |                  |
| [D] Cell cycle control                 | 0                    | 10               | 3                    | 9                |
| [V] Defense mechanisms                 | 0                    | 2                | 3                    | 5                |
| [T] Signal transduction                | 0                    | 3                | 0                    | 3                |
| [M] Cell wall/membrane                 | 3                    | 51               | 10                   | 53               |
| [N] Cell motility                      | 0                    | 0                | 4                    | 32               |
| [U] Intracellular trafficking          | 1                    | 18               | 5                    | 28               |
| [O] Posttranslational modification     | 1                    | 32               | 3                    | 33               |
| <b>Metabolism</b>                      |                      |                  |                      |                  |
| [C] Energy production                  | 1                    | 46               | 3                    | 34               |
| [G] Carbohydrate transport/metabolism  | 0                    | 25               | 1                    | 16               |
| [E] Amino acid transport/metabolism    | 2                    | 68               | 8                    | 30               |
| [F] Nucleotide transport/metabolism    | 1                    | 21               | 5                    | 33               |
| [H] Coenzyme transport/metabolism      | 4                    | 46               | 14                   | 54               |
| [I] Lipid transport/metabolism         | 1                    | 26               | 4                    | 25               |
| [P] Inorganic ion transport/metabolism | 0                    | 25               | 2                    | 15               |
| [Q] Secondary metabolites              | 0                    | 3                | 0                    | 4                |
| <b>Poorly characterized</b>            |                      |                  |                      |                  |
| [R] General function prediction only   | 2                    | 37               | 8                    | 37               |
| [S] Function unknown                   | 2                    | 16               | 1                    | 18               |

\*Species abbreviations: BP, *B. pennsylvanicus*; WG, *W. glossinidia*.

<sup>†</sup>Poly(A) = Number of protein coding genes containing at least one poly(A) tract of 10 nucleotides or more.

<sup>‡</sup>Total number of protein coding genes.
